# Supplementary material for: Individual heritable differences result in unique cell lymphocyte receptor repertoires of naïve and antigen-experienced cells
Source: PubMed Central journal article supplement (PMC5191574; doi:10.1038/ncomms11112), 2016-03-23
Supplement: ncomms11112-s1.pdf [file ncomms11112-s1.pdf]

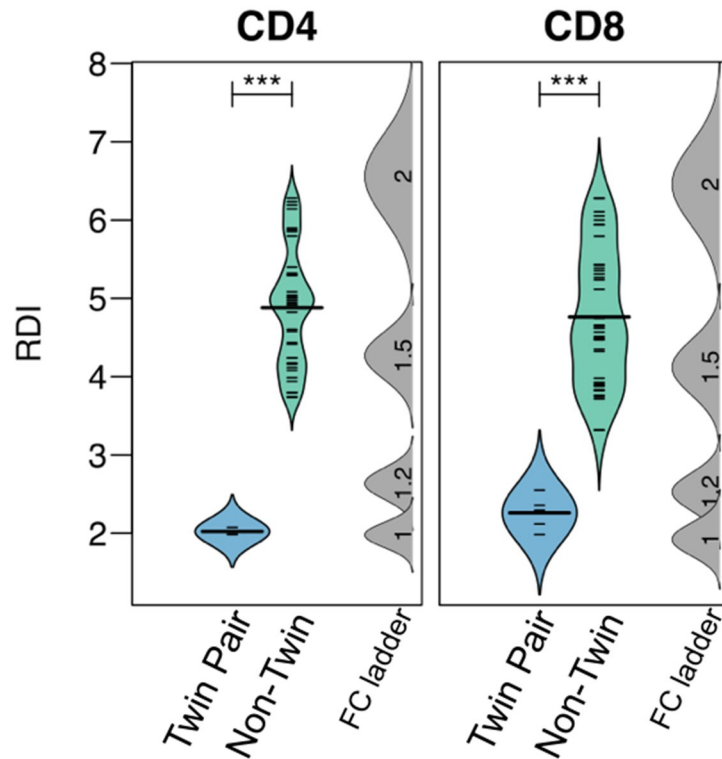

**Supplementary Figure 1. Heritable influences affect the TCR $\alpha$  V gene repertoire.**

TCR $\alpha$  CD4<sup>+</sup> and CD8<sup>+</sup> naïve T cell subsets were compared between each pair of donors, and RDI measures were separated into genetically related (twin-pair; blue) and unrelated (non-twin; green) comparison groups. Individual RDI distances (tick marks) and a kernel density estimate (curved line) are shown for each group. Simulated data with controlled levels of variance (average fold change of gene segments = 1, 1.5, or 2; indicated numbers) were included in each set of calculations (FC ladder) to estimate the relative difference between repertoires. The significance of the difference between the two groups was assessed using the Wilcoxon Rank Sum test. (\*\*\*) -  $p < 0.001$ )

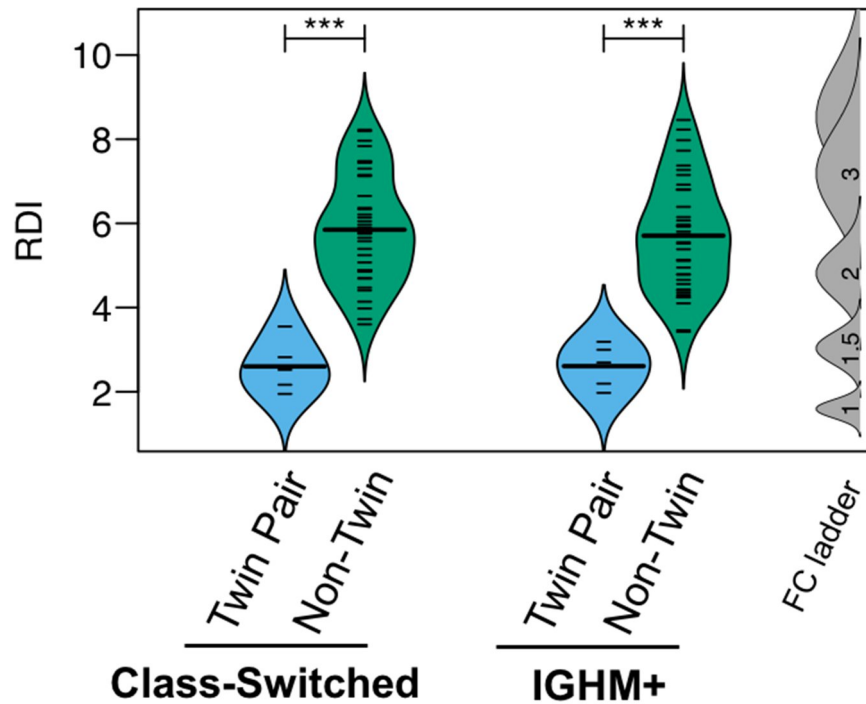

**Supplementary Figure 2. Heritable bias is consistent in IGHM+ and class-switched memory B cells.** V segment repertoires of IGHM+ and class-switched B cell memory subsets were compared between each pair of donors, and the RDI dissimilarities were split into related (twin pair; blue) and unrelated (non-twin; green) comparison groups. Individual RDI distances (tick marks) and a kernel density plot (curved line) are shown for each group. Simulated data with controlled levels of variance (average fold change of V genes = 1, 1.2, 1.5, or 2; indicated numbers) were included in each set of calculations (FC ladder) to estimate the relative difference between repertoires. (\* -  $p < 0.05$ ; \*\* -  $p < 0.01$ ; \*\*\* -  $p < 0.001$ )

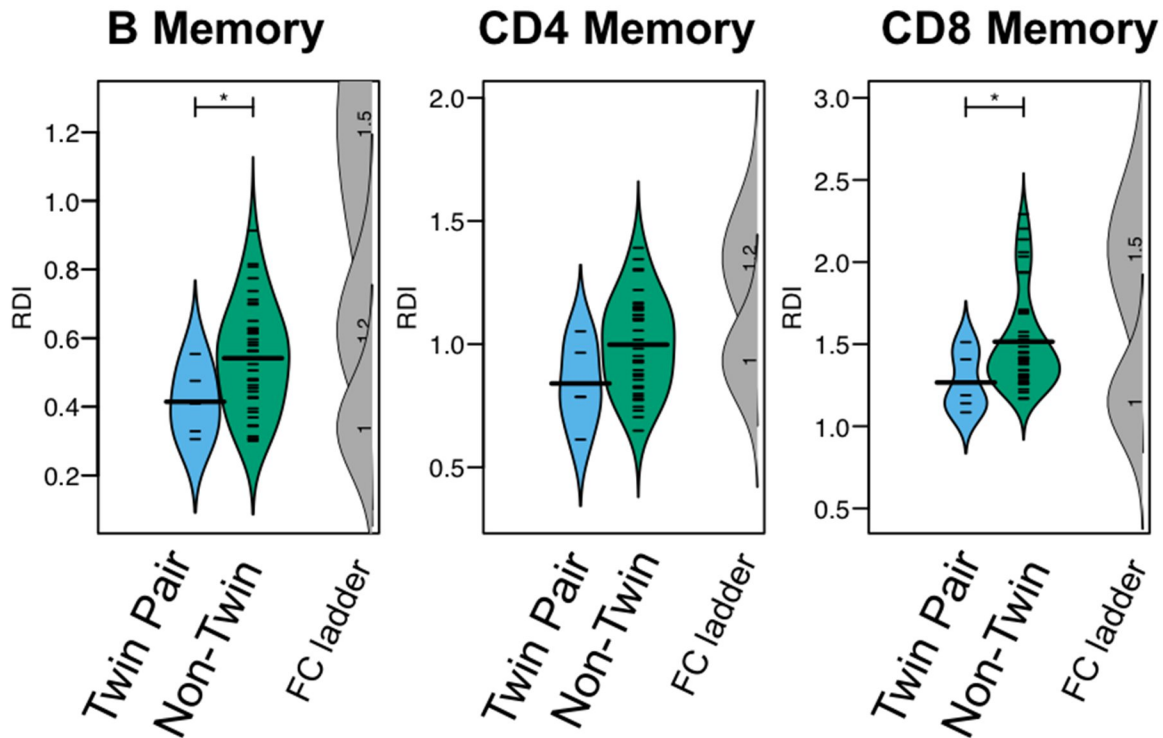

**Supplementary Figure 3. Small but consistent heritable bias in memory J segment repertoires.** J segment repertoires of the IGH B cell, TCR $\beta$  CD4<sup>+</sup> and CD8<sup>+</sup> T cell memory subsets were compared between each pair of donors, and the RDI dissimilarities were split into related (twin pair; blue) and unrelated (non-twin; green) comparison groups. Individual RDI distances (tick marks) and a kernel density plot (curved line) are shown for each group. Simulated data with controlled levels of variance (average fold change of J genes = 1, 1.2, 1.5, or 2; indicated numbers) were included in each set of calculations (FC ladder) to estimate the relative difference between repertoires. (\* -  $p < 0.05$ ; \*\* -  $p < 0.01$ ; \*\*\* -  $p < 0.001$ )

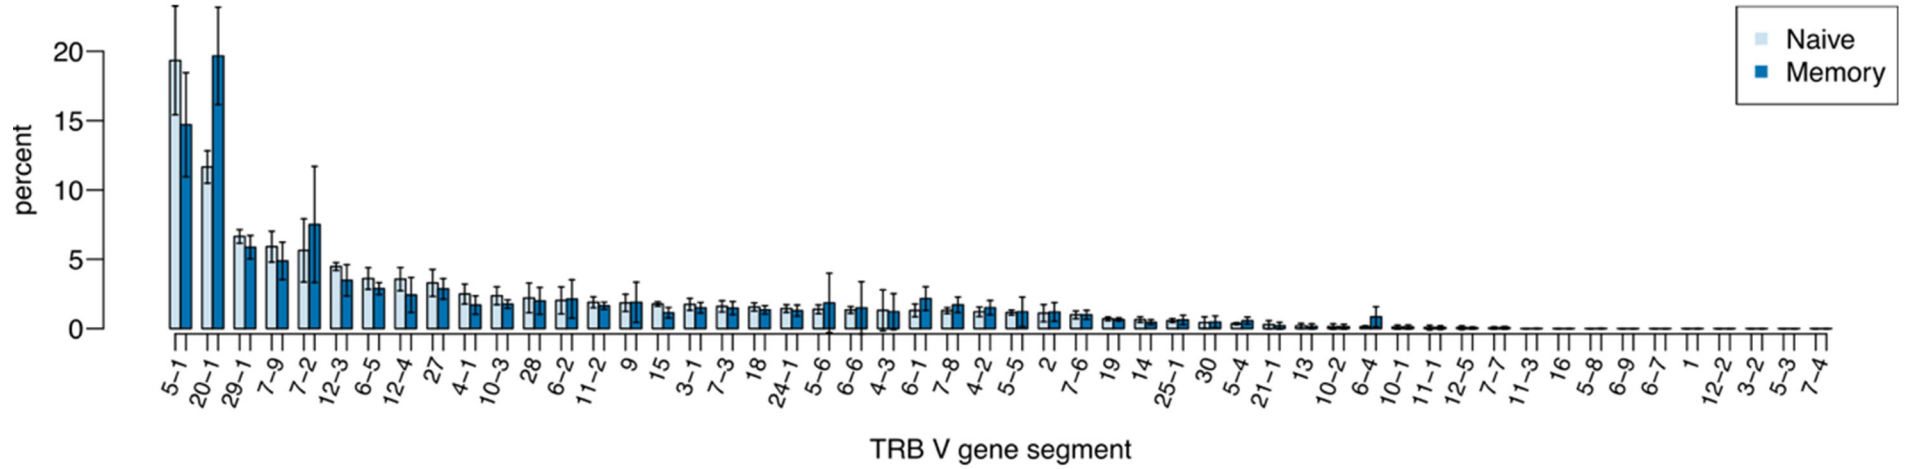

**Supplementary Figure 4. TCR $\beta$  V gene segments change in frequency.** The percentage of sequences using individual TCR $\beta$  V genes was calculated for each of the ten donors, and the mean for naïve (light blue) and memory (dark blue) T cell subsets (CD4<sup>+</sup> and CD8<sup>+</sup> combined) is shown with the standard deviation (error bars).

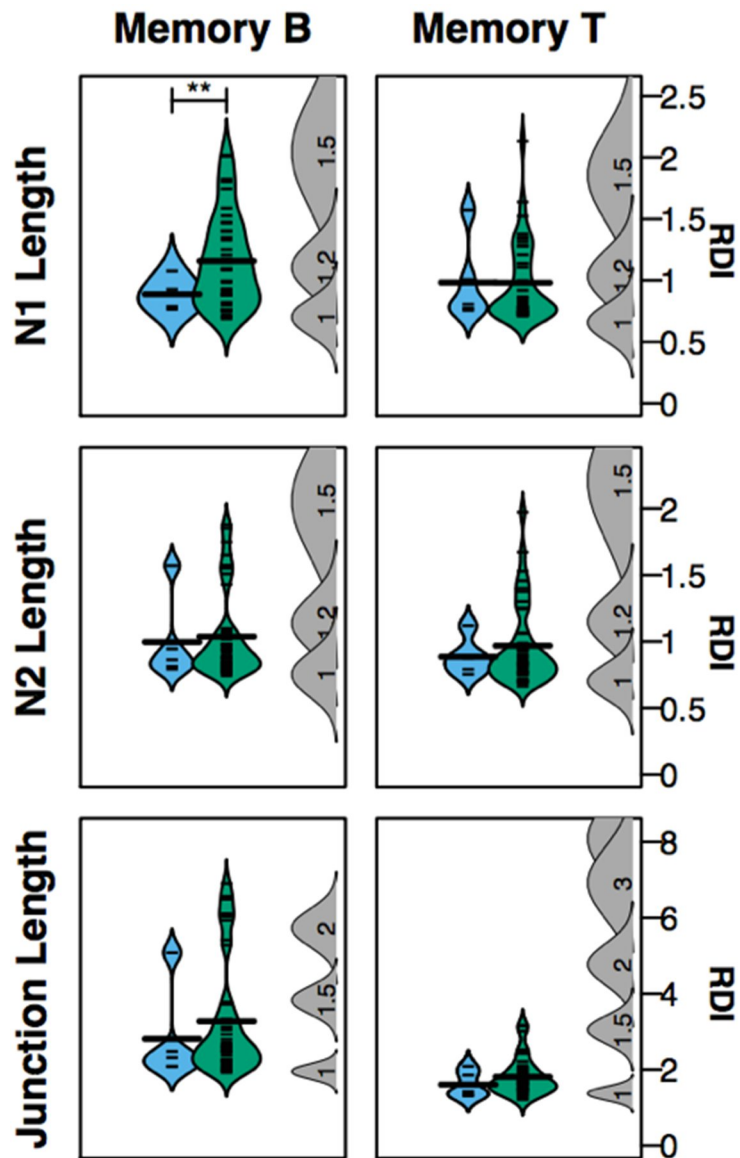

**Supplementary Figure 5. No significant heritable biases were found for memory N1, N2, and junction length.** N1, N2, and Junction length repertoires of the IGH B cell and TCR $\beta$  T cell (CD4<sup>+</sup> and CD8<sup>+</sup> combined) memory subsets were compared between each pair of donors, and the RDI dissimilarities were split into related (twin pair; blue) and unrelated (non-twin; green) comparison groups. Individual RDI distances (tick marks) and a kernel density plot (curved line) are shown for each group. Simulated data with controlled levels of variance (average fold change = 1, 1.2, 1.5, or 2; indicated numbers) were included in each set of calculations (FC ladder) to estimate the relative difference between repertoires.

### Supplementary Table 1. N5 oligos used for the creation of the amplicons. Z = 5'C3-Spacer

|      |                                                                           |
|------|---------------------------------------------------------------------------|
| N502 | zAATGATACGGCGACCACCGAGATCTACAC-CTCTCTAT-TCGTCGGCAGCGTCAGATGTGTATAAGAGACAG |
| N503 | zAATGATACGGCGACCACCGAGATCTACAC-TATCCTCT-TCGTCGGCAGCGTCAGATGTGTATAAGAGACAG |
| N504 | zAATGATACGGCGACCACCGAGATCTACAC-AGAGTAGA-TCGTCGGCAGCGTCAGATGTGTATAAGAGACAG |
| N505 | zAATGATACGGCGACCACCGAGATCTACAC-GTAAGGAG-TCGTCGGCAGCGTCAGATGTGTATAAGAGACAG |
| N506 | zAATGATACGGCGACCACCGAGATCTACAC-ACTGCATA-TCGTCGGCAGCGTCAGATGTGTATAAGAGACAG |
| N507 | zAATGATACGGCGACCACCGAGATCTACAC-AAGGAGTA-TCGTCGGCAGCGTCAGATGTGTATAAGAGACAG |
| N508 | zAATGATACGGCGACCACCGAGATCTACAC-CTAAGCCT-TCGTCGGCAGCGTCAGATGTGTATAAGAGACAG |

### Supplementary Table 2. Constant region oligos.

|      |                                                               |
|------|---------------------------------------------------------------|
| TCRB | GTCTCGTGGGCTCGGAGATGTGTATAAGAGACAGnnnnggtcggggWagaagcctgtgg   |
| TCRA | GTCTCGTGGGCTCGGAGATGTGTATAAGAGACAGnnnacacggcagggtcaggg        |
| IgL  | GTCTCGTGGGCTCGGAGATGTGTATAAGAGACAGnnnnAGGAGGGCGGAACAGAGTGAC   |
| IgK  | GTCTCGTGGGCTCGGAGATGTGTATAAGAGACAGnnnngcaggcacacaacagaggcagt  |
| IgA  | GTCTCGTGGGCTCGGAGATGTGTATAAGAGACAGnnnnGAAGCCCTGGACCAGGCAKGC   |
| IgD  | GTCTCGTGGGCTCGGAGATGTGTATAAGAGACAGnnnnaggttctctggggctggctctg  |
| IgE  | GTCTCGTGGGCTCGGAGATGTGTATAAGAGACAGnnnnGTAGCCCGTGGCCAGGCAGCC   |
| IgG  | GTCTCGTGGGCTCGGAGATGTGTATAAGAGACAGnnnnnGTAGTCCTTGACCAGGCAGCC  |
| IgM  | GTCTCGTGGGCTCGGAGATGTGTATAAGAGACAGnnnnnnGAAGTCCTGTGCGAGGCAGCC |

### Supplementary Table 3. N7 oligos used for creation of the amplicons.

|      |                                                    |
|------|----------------------------------------------------|
| N701 | CAAGCAGAAGACGGCATAACGAGAT-TCGCCTTA-GTCTCGTGGGCTCGG |
| N702 | CAAGCAGAAGACGGCATAACGAGAT-CTAGTACG-GTCTCGTGGGCTCGG |
| N703 | CAAGCAGAAGACGGCATAACGAGAT-TTCTGCCT-GTCTCGTGGGCTCGG |
| N704 | CAAGCAGAAGACGGCATAACGAGAT-GCTCAGGA-GTCTCGTGGGCTCGG |
| N705 | CAAGCAGAAGACGGCATAACGAGAT-AGGAGTCC-GTCTCGTGGGCTCGG |
| N706 | CAAGCAGAAGACGGCATAACGAGAT-CATGCCTA-GTCTCGTGGGCTCGG |
| N707 | CAAGCAGAAGACGGCATAACGAGAT-GTAGAGAG-GTCTCGTGGGCTCGG |
| N708 | CAAGCAGAAGACGGCATAACGAGAT-CCTCTCTG-GTCTCGTGGGCTCGG |
| N709 | CAAGCAGAAGACGGCATAACGAGAT-AGCGTAGC-GTCTCGTGGGCTCGG |
| N710 | CAAGCAGAAGACGGCATAACGAGAT-CAGCCTCG-GTCTCGTGGGCTCGG |
